# Supplementary material for: Genomic Analysis of Differentiation between Soil Types Reveals Candidate Genes for Local Adaptation in Arabidopsis lyrata
Source: PubMed Central journal article supplement (PMC2527522; doi:10.1371/journal.pone.0003183), 2008-09-11
Supplement: pone.0003183.s001.pdf [file pone.0003183.s001.pdf]

**Data set 1. Significant GO terms.****n = number of sig. genes, k = number of genes in term, p = p-value**

| <b>GO term</b>                                             | <b>n</b> | <b>k</b> | <b>p</b>   |
|------------------------------------------------------------|----------|----------|------------|
| lactose_catabolic_process,_using_glucoside_3-dehydrogenase | 4        | 4        | 0.0001775  |
| lactose_catabolic_process_via_UDP-galactose                | 4        | 15       | 0.00023039 |
| kinase_activity                                            | 45       | 1342     | 0.00029211 |
| transporter_activity                                       | 42       | 1233     | 0.00033885 |
| ATPase_activity                                            | 10       | 136      | 0.00038664 |
| beta-galactosidase_activity                                | 4        | 18       | 0.00045648 |
| lactose_catabolic_process                                  | 4        | 19       | 0.00055817 |
| beta-galactosidase_complex                                 | 4        | 20       | 0.00067499 |
| microtubule-based_movement                                 | 6        | 56       | 0.00086951 |
| integral_to_membrane                                       | 18       | 399      | 0.00096243 |
| regulation_of_shoot_development                            | 2        | 3        | 0.00161064 |
| cytokinin_receptor_activity                                | 2        | 3        | 0.00161064 |
| calcium:sodium_antipporter_activity                        | 2        | 4        | 0.00282708 |
| protein_amino_acid_phosphorylation                         | 31       | 933      | 0.0028554  |
| 1-phosphatidylinositol-4-phosphate_5-kinase_activity       | 3        | 15       | 0.00324695 |
| transport                                                  | 49       | 1691     | 0.00340742 |
| nucleotide_binding                                         | 37       | 1189     | 0.00347684 |
| membrane                                                   | 39       | 1276     | 0.00368451 |
| plasma_membrane                                            | 15       | 366      | 0.00585629 |
| microtubule_associated_complex                             | 5        | 59       | 0.00619888 |
| regulation_of_seed_germination                             | 2        | 6        | 0.00620115 |
| potassium_ion_transmembrane_transporter_activity           | 3        | 19       | 0.00623533 |
| intracellular_ligand-gated_ion_channel_activity            | 3        | 20       | 0.00717056 |
| cellular_calcium_ion_homeostasis                           | 3        | 21       | 0.00818449 |
| regulation_of_stomatal_movement                            | 3        | 22       | 0.00927853 |
| metabolic_process                                          | 19       | 536      | 0.00934106 |
| microtubule_motor_activity                                 | 5        | 67       | 0.01034457 |
| potassium_ion_transport                                    | 4        | 45       | 0.0118877  |
| starch_metabolic_process                                   | 2        | 9        | 0.01343227 |
| other_membranes                                            | 149      | 6557     | 0.01418754 |
| transferase_activity                                       | 51       | 1924     | 0.01447431 |
| stomatal_movement                                          | 2        | 10       | 0.01637497 |
| defense_response,_incompatible_interaction                 | 2        | 10       | 0.01637497 |
| COPII_vesicle_coat                                         | 2        | 10       | 0.01637497 |
| nuclear_pore                                               | 3        | 28       | 0.01758247 |
| cation:cation_antipporter_activity                         | 2        | 11       | 0.01956551 |
| inward_rectifier_potassium_channel_activity                | 2        | 11       | 0.01956551 |
| ATP_binding                                                | 22       | 703      | 0.02008987 |
| hydrolase_activity                                         | 64       | 2574     | 0.02284657 |
| trans-Golgi_network                                        | 2        | 12       | 0.02299336 |
| alkaloid_biosynthetic_process                              | 2        | 13       | 0.02664833 |
| calmodulin-dependent_protein_kinase_activity               | 3        | 33       | 0.02684225 |
| cation_transport                                           | 5        | 89       | 0.03053634 |
| endoplasmic_reticulum                                      | 10       | 262      | 0.03326204 |
| strictosidine_synthase_activity                            | 2        | 15       | 0.03460028 |
| protein_histidine_kinase_activity                          | 2        | 15       | 0.03460028 |
| base-excision_repair                                       | 2        | 16       | 0.03887833 |
| response_to_oxidative_stress                               | 7        | 162      | 0.03985703 |
| inositol_or_phosphatidylinositol_kinase_activity           | 2        | 17       | 0.04334562 |
| cellular_protein_metabolic_process                         | 2        | 17       | 0.04334562 |
| cytokinin_mediated_signaling                               | 3        | 40       | 0.04337804 |
| biosynthetic_process                                       | 5        | 100      | 0.04627508 |

|                                                          |   |    |            |
|----------------------------------------------------------|---|----|------------|
| FAD_binding                                              | 2 | 18 | 0.04799337 |
| sucrose_catabolic_process,_using_beta-fructofuranosidase | 2 | 18 | 0.04799337 |

GO terms with only one gene, where that gene is significant:

|                                                                 |   |   |            |
|-----------------------------------------------------------------|---|---|------------|
| embryonic_root_morphogenesis                                    | 1 | 1 | 0.01911819 |
| pollination                                                     | 1 | 1 | 0.01911819 |
| cellular_sodium_ion_homeostasis                                 | 1 | 1 | 0.01911819 |
| cycloartenol_synthase_activity                                  | 1 | 1 | 0.01911819 |
| acetate_metabolic_process                                       | 1 | 1 | 0.01911819 |
| meiotic_chromosome_separation                                   | 1 | 1 | 0.01911819 |
| SUMO-specific_protease_activity                                 | 1 | 1 | 0.01911819 |
| calcium-dependent_protein_serine/threonine_kinase_activity      | 1 | 1 | 0.01911819 |
| mitotic_chromosome_condensation                                 | 1 | 1 | 0.01911819 |
| acquisition_of_desiccation_tolerance                            | 1 | 1 | 0.01911819 |
| tRNA_(5-methylaminomethyl-2-thiouridylate)-methyltransferase_ac | 1 | 1 | 0.01911819 |
| chloroplast_isoamylase_complex                                  | 1 | 1 | 0.01911819 |
| nodulation                                                      | 1 | 1 | 0.01911819 |
| voltage-gated_calcium_channel_activity                          | 1 | 1 | 0.01911819 |
| positive_regulation_of_meiosis                                  | 1 | 1 | 0.01911819 |
| ATPase_activator_activity                                       | 1 | 1 | 0.01911819 |
| response_to_boron                                               | 1 | 1 | 0.01911819 |
| structural_constituent_of_nuclear_pore                          | 1 | 1 | 0.01911819 |
| positive_regulation_of_sister_chromatid_cohesion                | 1 | 1 | 0.01911819 |
| GTP_cyclohydrolase_I_activity                                   | 1 | 1 | 0.01911819 |
| 3-oxoacyl-[acyl-carrier-protein]_reductase_activity             | 1 | 1 | 0.01911819 |

**excluding probes with FDR<0.01:**

| <b>GO term</b>                                  | <b>n</b> | <b>k</b> | <b>p</b>   |
|-------------------------------------------------|----------|----------|------------|
| ATPase_activity                                 | 8        | 136      | 4.9869E-05 |
| microtubule-based_movement                      | 4        | 56       | 0.00200573 |
| defense_response,_incompatible_interaction      | 2        | 10       | 0.0040646  |
| COPII_vesicle_coat                              | 2        | 10       | 0.0040646  |
| trans-Golgi_network                             | 2        | 12       | 0.00578191 |
| alkaloid_biosynthetic_process                   | 2        | 13       | 0.00674441 |
| strictosidine_synthase_activity                 | 2        | 15       | 0.0088704  |
| metabolic_process                               | 11       | 536      | 0.01271632 |
| binding                                         | 15       | 843      | 0.01352415 |
| intracellular_ligand-gated_ion_channel_activity | 2        | 20       | 0.0152973  |
| cellular_calcium_ion_homeostasis                | 2        | 21       | 0.01676325 |
| regulation_of_stomatal_movement                 | 2        | 22       | 0.01828656 |
| microtubule_associated_complex                  | 3        | 59       | 0.01829578 |
| positive_regulation_of_flower_development       | 2        | 25       | 0.02318889 |
| microtubule_motor_activity                      | 3        | 67       | 0.02539297 |
| protein_modification_process                    | 3        | 70       | 0.0283836  |
| nucleotide_binding                              | 18       | 1189     | 0.03093273 |
| cell_death                                      | 2        | 30       | 0.03239956 |
| calmodulin-dependent_protein_kinase_activity    | 2        | 33       | 0.03850235 |
| Golgi_apparatus                                 | 5        | 201      | 0.04126942 |

GO terms with only one gene, where that gene is significant:

|                                                            |   |   |            |
|------------------------------------------------------------|---|---|------------|
| cycloartenol_synthase_activity                             | 1 | 1 | 0.00927192 |
| SUMO-specific_protease_activity                            | 1 | 1 | 0.00927192 |
| calcium-dependent_protein_serine/threonine_kinase_activity | 1 | 1 | 0.00927192 |

|                                                                 |   |   |            |
|-----------------------------------------------------------------|---|---|------------|
| tRNA_(5-methylaminomethyl-2-thiouridylate)-methyltransferase_ac | 1 | 1 | 0.00927192 |
| nodulation                                                      | 1 | 1 | 0.00927192 |
| positive_regulation_of_meiosis                                  | 1 | 1 | 0.00927192 |
| ATPase_activator_activity                                       | 1 | 1 | 0.00927192 |
| response_to_boron                                               | 1 | 1 | 0.00927192 |
| 3-oxoacyl-[acyl-carrier-protein]_reductase_activity             | 1 | 1 | 0.00927192 |
